# Supplementary material for: A genomic snapshot of Salmonella enterica serovar Typhi in Colombia
Source: PLoS Negl Trop Dis. 2021 Sep 16;15(9):e0009755. doi: 10.1371/journal.pntd.0009755 (PMC8478212; doi:10.1371/journal.pntd.0009755)
Supplement: S1 Table — (XLSX) [file pntd.0009755.s001.xlsx]

## Sheet: Sheet1
ID	Year	Location (Departments)	Sex	Age (years)	Sample source	Outbreak	Antimicrobial susceptibility profile	PFGE Pattern	PFGE pattern code	Genotype	Plasmid	AMR-CIP	SNP CIP	AMR-NAL	SNP NAL	AMR-SUL	Gene SUL	AMR-TET	Gene TET	AMR-AMP	Gene AMP	AMR-CEP	Gene CEP
COL_INS-GMR-S-416-18	2018	Cauca	Male	13	Blood		Sensible	253	COIN18JPPX01.0253	2	no
COL_INS-GMR-S-421-18	2018	Antioquia	Female	27	Stool		Sensible	249	COIN18JPPX01.0249	3.5	no
COL_INS-S.Ty69/9-00	2000	Putumayo	Male	19	Blood	G	Sensible	235	COIN00JPPX01.0235	2.5	no
COL_INS-GMR-S-470-18	2018	Risaralda	Male	21	Blood	E	Sensible	250	COIN18JPPX01.0250	2.5	no
COL_INS-GMR-S-480-18	2018	Norte de Santander	Male	47	Blood		NAL	245	COIN18JPPX01.0245	2.5	no	CIP	gyrA_D87G	NAL	gyrA_D87G
COL_INS-GMR-S-547-18	2018	Nariño	Female	25	Blood		Sensible	235	COIN18JPPX01.0235	2.5	no
COL_INS-GMR-S-591-18	2018	Casanare	Male	0	Blood		Sensible	260	COIN18JPPX01.0260	2.5	no
COL_INS-GMR-S-647-18	2018	Meta	Male	29	Blood		Sensible	58	COIN18JPPX01.0058	3.5	no
COL_INS-GMR-S-432-18	2018	Huila	Female	15	Blood		NAL	6	COIN18JPPX01.0006	3.5	no	CIP	gyrA_S83F	NAL	gyrA_S83F
COL_INS-S.Ty72/12-00	2000	Putumayo	Male	24	Blood	G	Sensible	235	COIN00JPPX01.0235	2.5	no
COL_INS-S.Ty49/39-97	1997	Tolima	Female	17	Blood		Sensible	28	COIN97JPPX01.0028	2	no
COL_INS-S.Ty83/68-00	2000	Huila	Female	6	Bone marrow		Sensible	19	COIN00JPPX01.0019	2	no
COL_INS-S.Ty0115/36-03	2003	Risaralda	Female	6	Blood		SXT-TET	20	COIN03JPPX01.0020	2	no
COL_INS-S.Ty0130/69-04	2004	Huila	Male	0	Blood		NAL-CIP(I)	41	COIN04JPPX01.0041	1.1	no	CIP	gyrA_S83F	NAL	gyrA_S83F
COL_INS-S.Ty0140/269-04	2004	Valle del Cauca	Female	48	Blood		Sensible	46	COIN04JPPX01.0046	0.1.3	no
COL_INS-S.Ty0144/6-05	2005	Boyacá	Male	21	Blood	D	Sensible	17	COIN05JPPX01.0017	2.5	No
COL_INS-S-Ty-182-312-2005	2005	Antioquia	Male	22	Blood		Sensible	50	COIN05JPPX01.0050	2.5	no
COL_INS-S.Ty59/37-99	1999	Caldas	Male	22	Blood		Sensible	90	COIN99JPPX01.0090	2.5	no
COL_INS-S.Ty62/49-99	1999	Cundinamarca	Female	72	Blood		Sensible	13	COIN99JPPX01.0013	2	no
COL_INS-S.Ty66/143-99	1999	Magdalena	Male	48	Stool		Sensible	56	COIN99JPPX01.0056	2.5	no
COL_INS-S.Ty980/524-15	2015	Norte de Santander	Male	20	Blood	C	AMP-CTX-TET-S	83	COIN15JPPX01.0083	2.5	ColRNAI					Sulfonamides	Sul2	Tetracycline	TetA(A)
COL_INS-S.Ty60/38-99	1999	Caldas	Female	41	Blood		Sensible	12	COIN99JPPX01.0012	2.5	no
COL_INS-S.Ty1100/1425-15	2015	Norte de Santander	Female	17	Stool		NAL(I)-CIP(I)	83	COIN15JPPX01.0083	3.5	no	CIP	gyrA_S83F	NAL	gyrA_S83F
COL_INS-S.Ty1013/755-15	2015	Huila	Female	8	Stool		NAL	6	COIN15JPPX01.0006	2.5	no	CIP	gyrA_D87G	NAL	gyrA_D87G
COL_INS-S.Ty1037/743-15	2015	Bolívar	Male	31	Blood		Sensible	156	COIN15JPPX01.0156	2.5	no
COL_INS-S.Ty1335/1081-15	2015	Meta	Female	21	Blood		Sensible	250	COIN15JPPX01.0250	3.5	no
COL_INS-S.Ty1062/1087-15	2015	Meta	Male	67	Blood	B	AMP	32	COIN15JPPX01.0032	3.5	no
COL_INS-GMR-S-298-16	2016	Norte de Santander	Male	34	Splenic abscess		Sensible	115	COIN16JPPX01.0115	2.5	no
COL_INS-S.Ty64/59-00	2000	Antioquia	Male	65	Blood		Sensible	247	COIN00JPPX01.0247	2.5	no
COL_INS-GMR-S-657-16	2016	Nariño	Male	sd	Hands surface		Sensible	4	COIN16JPPX01.0004	2.5	no
COL_INS-S.Ty1124-16	2016	Huila	Male	64	Blood		Sensible	62	COIN16JPPX01.0062	2.5	no
COL_INS-GMR-S-29-17	2017	Huila	Male	13	Blood		Sensible	241	COIN17JPPX01.0241	2.5	no
COL_INS-GMR-S-99-17	2017	Casanare	Male	23	Blood		Sensible	242	COIN17JPPX01.0242	3.5	no
COL_INS-GMR-S-114-17	2017	Bogotá	Male	24	Blood		NAL	235	COIN17JPPX01.0235	2.5	no	CIP	gyrB_S464Y	NAL	gyrB_S464Y
COL_INS-GMR-S-284-17	2017	Cesar	Male	47	Blood		Sensible	235	COIN17JPPX01.0235	2.5	no
COL_INS-GMR-S-752-17	2017	Norte de Santander	Male	38	Blood		NAL	252	COIN17JPPX01.0252	2.5	no	CIP	gyrA_D87G	NAL	gyrA_D87G
COL_INS-GMR-S-49-18	2018	Meta	Female	28	Blood		Sensible	104	COIN18JPPX01.0104	3.5	no
COL_INS-GMR-S-52-18	2018	Atlántico	Female	2	Blood		Sensible	165	COIN18JPPX01.0165	2.5	no
COL_INS-S.Ty68/08-00	2000	Putumayo	Male	unknown	Blood	G	Sensible	235	COIN00JPPX01.0235	2.5	no
COL_INS-GMR-S-67-18	2018	Valle del Cauca	Female	28	Blood		Sensible	255	COIN18JPPX01.0255	2.5	no
COL_INS-GMR-S-72-18	2018	Antioquia	Male	unknown	Blood		Sensible	249	COIN18JPPX01.0249	3.5	no
COL_INS-GMR-S-91-18	2018	Huila	Female	31	Blood		NAL	257	COIN18JPPX01.0257	3.5	no	CIP	gyrA_S83F	NAL	gyrA_S83F
COL_INS-GMR-S-95-18	2018	Huila	Female	31	Blood		Sensible	254	COIN18JPPX01.0254	2.5	no
COL_INS-GMR-S-119-18	2018	Sucre	Male	8	Blood		Sensible	256	COIN18JPPX01.0256	2.5	no
COL_INS-GMR-S-331-18	2018	Bogotá	Female	18	Gluteus abscess		NAL-CIP(I)	58	COIN18JPPX01.0058	3.5	no	CIP	gyrA_D87Y	NAL	gyrA_D87Y
COL_INS-GMR-S-414-18	2018	Bolívar	Male	3	Blood		Sensible	248	COIN18JPPX01.0248	2.5	no
COL_INS-S.Ty0145/7-05	2005	Boyacá	Female	4	Blood	D	Sensible	17	COIN05JPPX01.0017	2.5	no
COL_INS-S.Ty162(160)/189-05	2005	Antioquia	Male	22	Blood		Sensible	35	COIN05JPPX01.0035	2.5	no
COL_INS-S.Ty0178/255-05	2005	Valle del Cauca	Female	20	Blood		Sensible	58	COIN05JPPX01.0058	3.5	no
COL_INS-S.Ty0253/397-07	2007	Antioquia	Male	9	Bone marrow		NAL	2	COIN07JPPX01.0002	2.5	no	CIP	gyrA_D87N	NAL	gyrA_D87N
COL_INS-S.Ty0194/74-06	2006	Antioquia	Female	28	Blood		Sensible	81	COIN06JPPX01.0081	2.5	no
COL_INS-S.Ty0278/322-08	2008	Cauca	Male	10	Blood	F	Sensible	8	COIN08JPPX01.0008	2.5	no
COL_INS-S.Ty301/485-08	2008	Meta	Female	16	Blood		Sensible	58	COIN08JPPX01.0058	3.5	no
COL_INS-S.Ty0302/486-08	2008	Meta	Female	5	Blood		Sensible	77	COIN08JPPX01.0077	2.5	no
COL_INS-S.Ty0330/256-08	2008	Meta	Male	20	Blood		AMP(I)	77	COIN08JPPX01.0077	2.5	no
COL_INS-S.Ty0324/122-09	2009	Meta	Male	10	Blood		Sensible	79	COIN09JPPX01.0079	3.5	no
COL_INS-S.Ty343/320-09	2009	Meta	Female	20	Blood		Sensible	101	COIN09JPPX01.0101	2.5	no
COL_INS-S.Ty423/316-10	2010	Bogotá	Female	19	Blood		NAL	26	COIN10JPPX01.0026	2.5	no	CIP	gyrA_S83Y	NAL	gyrA_S83Y
COL_INS-S.Ty446/580-10	2010	Huila	Female	13	Blood		Sensible	88	COIN10JPPX01.0088	2.5	no
COL_INS-S.Ty509/474-11	2011	Caquetá	Male	sd	Blood		Sensible	25	COIN11JPPX01.0025	2.5	no
COL_INS-S.Ty522/738-11	2011	Sucre	Female	61	Stool		Sensible	4	COIN11JPPX01.0004	2.5	no
COL_INS-S.Ty646/252-12	2012	Norte de Santander	Male	3	Blood		Sensible	115	COIN13JPPX01.0115	2.5	no
COL_INS-S.Ty538/7-12	2012	Huila	Male	30	Blood	A	Sensible	155	COIN12JPPX01.0155	3.5	IncFIB(pHCM2)
COL_INS-S.Ty551/52-12	2012	Bogotá	Male	11	Stool		AMP-CTX (CTX-M-12,blaTEM-1)	100	COIN12JPPX01.0100	3.5	IncL/M(pOXA-48), IncFIB(pHCM2)					Sulfonamides	Sul1			AMP	TEM-1; blaCTX-M-12; blaOXA-15	Broad-Spectrum Cephalosporins	blaCTX-M-12; blaOXA-15
COL_INS-S.Ty553/66-12	2012	Atlántico	Female	10	Blood		Sensible	240	COIN12JPPX01.0240	3.5	no
COL_INS-S.Ty563/214-12	2012	Norte de Santander	Male	36	Stool		NAL(I)	74	COIN12JPPX01.0074	2.5	no
COL_INS-S.Ty574/302-12	2012	Norte de Santander	Female	14	Blood		Sensible	135	COIN12JPPX01.0135	2.5	no
COL_INS-S.Ty597/693-12	2012	Valle del Cauca	Male	19	Blood		Sensible	3	COIN12JPPX01.0003	2.5	no
COL_INS-S.Ty600/711-12	2012	Bogotá	Male	45	Blood		Sensible	199	COIN12JPPX01.0199	3.5	no
COL_INS-S.Ty602/755-12	2012	Santander	Male	20	Blood		Sensible	187	COIN12JPPX01.0187	2.5	no
COL_INS-S.Ty660/292-13	2013	Norte de Santander	Male	26	Blood		Sensible	178	COIN13JPPX01.0178	2.5	no
COL_INS-S.Ty666/329-13	2013	Bolívar	Male	36	Blood		NAL	127	COIN13JPPX01.0127	3.5	no	CIP	gyrA_D87G	NAL	gyrA_D87G
COL_INS-S.Ty667/346-13	2013	Atlántico	Male	15	Blood		Sensible	185	COIN13JPPX01.0185	3.5	no
COL_INS-S.Ty715/910-13	2013	Antioquia	Male	12	Bone marrow		Sensible	9	COIN13JPPX01.0009	2.5	no
COL_INS-S.Ty726/1010-13	2013	Norte de Santander	Male	14	Stool		Sensible	201	COIN13JPPX01.0201	2.5	no
COL_INS-S.Ty833/631-14	2014	Antioquia	Female	1	Blood	H	Sensible	102	COIN14JPPX01.0102	2.5	no
COL_INS-S.Ty772/314-14	2014	Norte de Santander	Female	3	Stool		NAL	187	COIN14JPPX01.0187	2.5	no	CIP	gyrA_D87V	NAL	gyrA_D87V
